# Supplementary material for: A fluorescent biosensor of lysozyme-stabilized copper nanoclusters for the selective detection of glucose
Source: Royal Society of Chemistry journal article supplement (doi:10.1039/c5ra19421k), 2015-01-01
Supplement: c5ra19421k1.pdf [file c5ra19421k1.pdf]

## **A fluorescent biosensor of lysozyme-stabilized copper nanoclusters for the selective detection of glucose**

Chan Wang <sup>a</sup>, Shili Shu <sup>c</sup>, Yagang Yao <sup>\*b</sup>, Qijun Song <sup>\*a</sup>

<sup>a</sup> Key Laboratory of Food Colloids and Biotechnology, Ministry of Education, School of Chemical & Material Engineering, Jiangnan University, Wuxi 214122, China.

<sup>b</sup> Suzhou Institute of Nano-tech and Nano-bionics, Chinese Academy of Sciences, Suzhou 215123, China.

<sup>c</sup> Department of Chemistry, Tangshan Normal University, Tangshan 063000, China.

---

<sup>\*a</sup> Corresponding author. Tel.: +86-510-85917763; *E-mail addresses*: qsong@jiangnan.edu.cn (Q. Song).

<sup>\*b</sup> Corresponding author. Tel.: +86-512-62872829; *E-mail addresses*: ygyao2013@sinano.ac.cn. (Y. Yao).

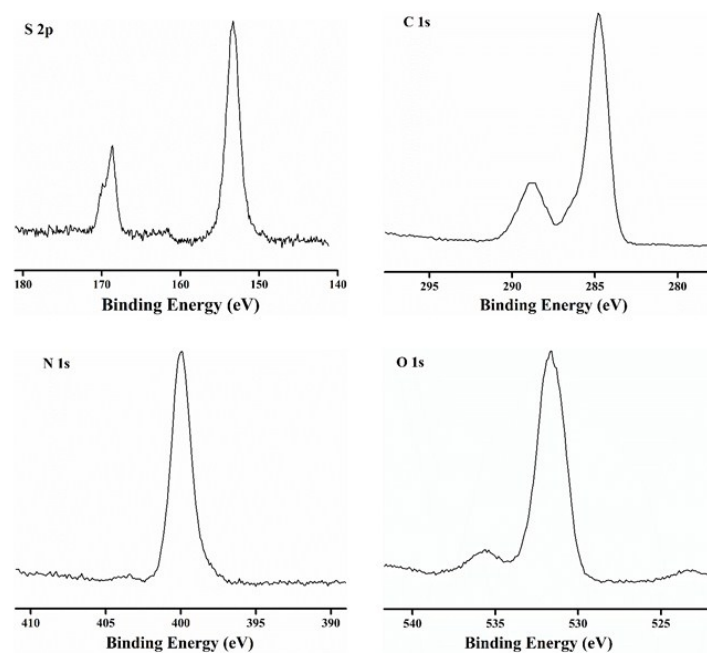

**Figure S1** Typical XPS spectra of (a) S 2p, (b) C 1s, (c) N 1s and (d) O 1s involved in the resultant Lys-CuNCs.

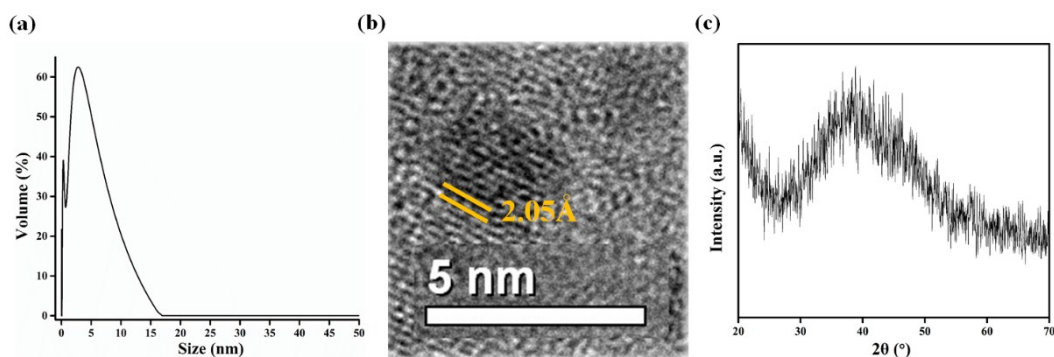

**Figure S2** (a) DLS measurement, (b) HRTEM micrograph and (c) XRD spectra of the synthesized fluorescence Lys-CuNCs.

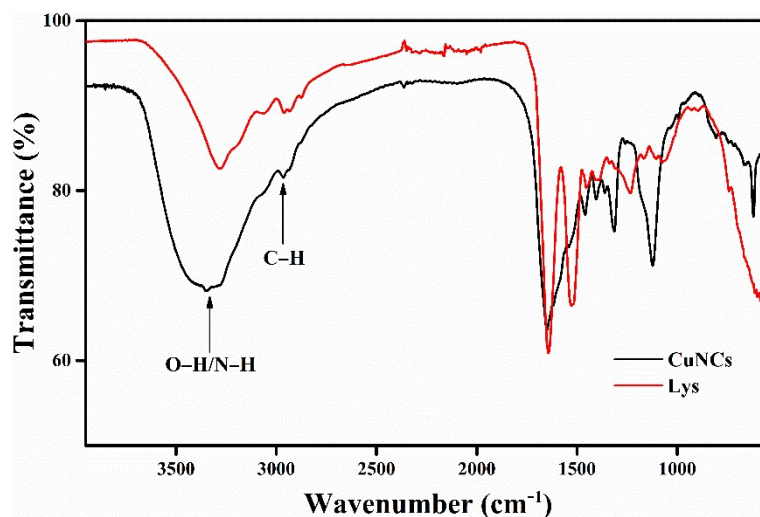

**Figure S3** FT-IR spectra of the lysozyme and Lys-CuNCs.

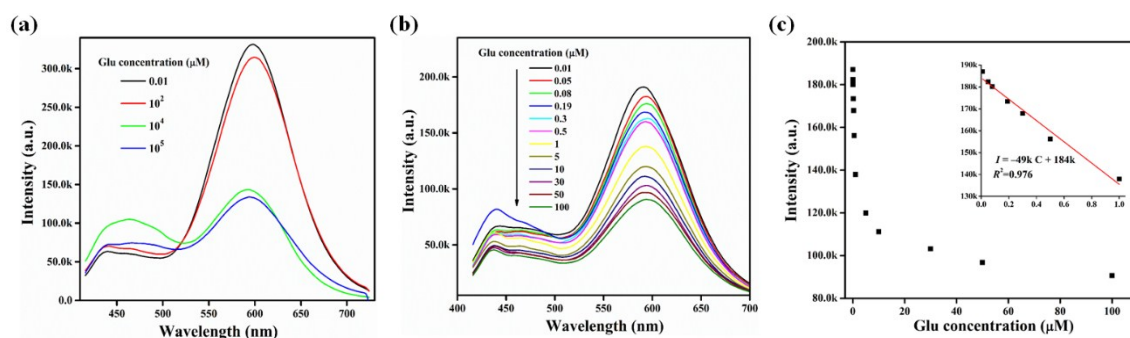

**Figure S4** Fluorescence spectra of Lys-CuNCs in the presence of different glucose concentrations at pH 5 (a) and 9 (b); (c) Fluorescence intensity at  $\lambda_{\max} = 600$  nm for Lys-CuNCs against the glucose concentrations. Inset: plots of fluorescence intensity vs concentration over two ranges of 0.01–1.0  $\mu\text{M}$ .

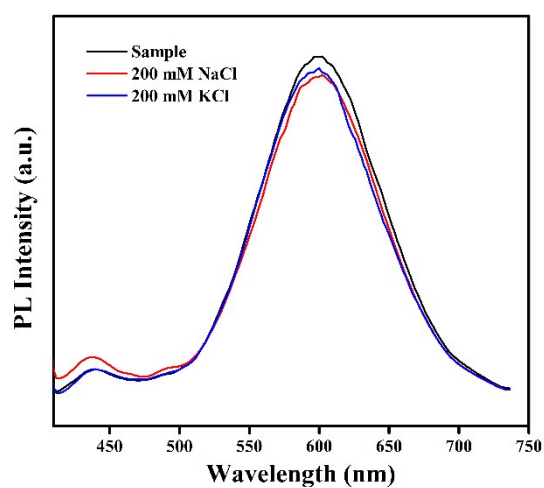

**Figure S5** Fluorescence spectra of Lys-CuNCs in the absence and presence of 200 mM KCl or NaCl solution.

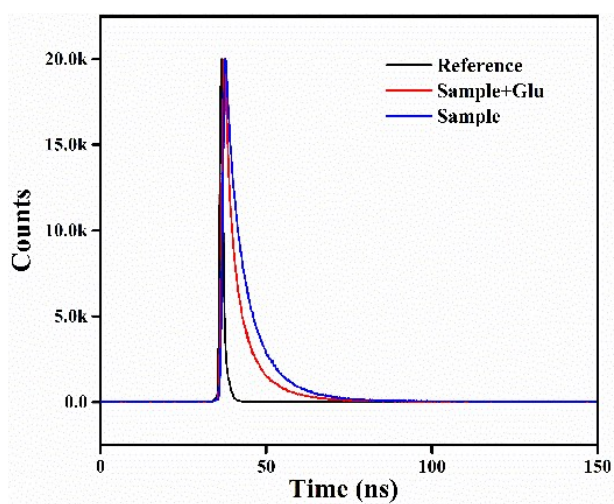

**Figure S6** PL decay profile ( $\lambda_{em} = 380$  nm) of the Lys-CuNCs in aqueous solution at the excitation of 495 nm. Fitted curves were overlaid on the experimental data.

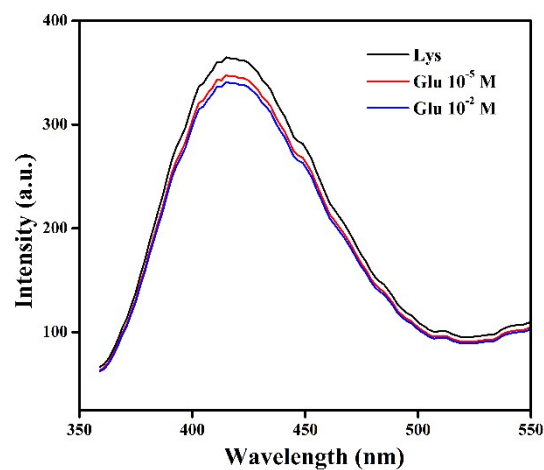

**Figure S7** The fluorescence spectra of the pristine lysozyme (without copper) in the presence of glucose at different concentration.

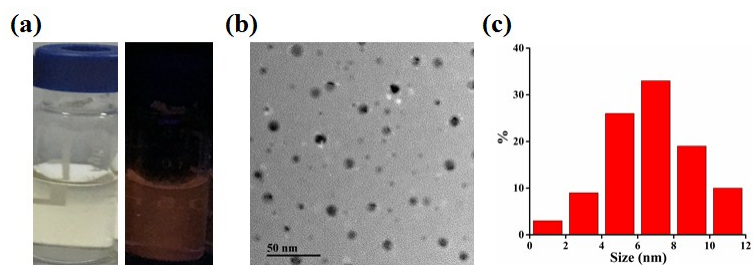

**Figure S8** (a) Photographs of the Lys–CuNCs adding with 1 mM glucose under the irradiation of visible (left) and UV (right) light. (b) Transmission electron microscopy (TEM) micrograph and (c) size distribution) of the synthesized fluorescence Lys–CuNCs/glucose.

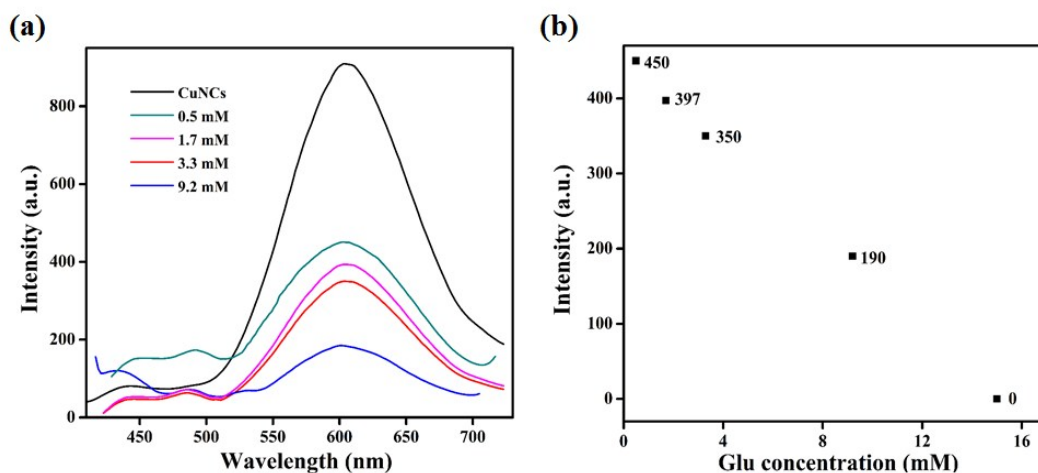

**Figure S9** (a) Fluorescence spectra of serum@Lys–CuNCs in the presence of different glucose concentrations. The arrows indicate the signal changes as increases in analyte concentrations (0, 0.5, 1.7, 3.3, and 9.2 mM). (b) Fluorescence intensity at  $\lambda_{\text{max}} = 600$  nm for serum@Lys–CuNCs against the glucose concentrations (The data obtained from 15 mM was approximately zero).
